# Supplementary material
Source: publisher figshare collection journal article supplement (https://gsajournals.figshare.com/ndownloader/files/14676761)
Supplement: Supplementary file 1 [file 14676761]

FullName	Pop	Comp1	Comp2	Comp3	Comp4	Comp5	Comp6
Ames2338:81N4HABXX:7:250033662	GW	0.3912	0	0.6088	0	0	0
PI601558:81FENABXX:3:250034836	GW	0.242	0	0.758	0	0	0
PI267166:81FENABXX:6:250035220	GW	0.106	0.0783	0.8158	0	0	0
PI601005:81FE8ABXX:3:250032182	GW	0.0499	0.0089	0.9413	0	0	0
PI601559:81FE8ABXX:1:250031915	GW	0.6269	0.283	0.0902	0	0	0
PI601808:81FE8ABXX:1:250031936	GW	0.5242	0.2093	0.2665	0	0	0
PI601560:81N4HABXX:6:250033611	GW	0.1455	0.0167	0.8377	0	0	0
PI415088:81FE8ABXX:4:250032331	GW	0.0637	0.0515	0.8848	0	0	0
PI601300:81FE8ABXX:1:250031885	GW	0.2036	0.0516	0.7448	0	0	0
PI198894:81FE8ABXX:5:250032470	GW	0.0654	0.0782	0.8563	0	0	0
PI198901:81FENABXX:5:250035090	GW	0.0792	0.08	0.8408	0	0	0
PI601745:81FE7ABXX:6:250031639	GW	0.5273	0.2741	0.1986	0	0	0
Ames2336:81FE7ABXX:5:250031533	GW	0.0926	0.0769	0.8305	0	0	0
PI601269:81N4HABXX:7:250033718	GW	0.0483	0.0334	0.9183	0	0	0
PI358532:81N4HABXX:5:250033411	GW	0.0896	0.2175	0.693	0	0	0
PI601561:81FE7ABXX:4:250031396	GW	0.1563	0.0087	0.835	0	0	0
PI601489:81FENABXX:1:250033809	GW	0.0587	0.0115	0.9299	0	0	0
PI601374:81FE8ABXX:5:250032400	GW	0.5179	0.2713	0.2107	0	0	0
PI601301:81FE7ABXX:4:250031364	GW	0.5065	0.3171	0.1764	0	0	0
PI601210:81FENABXX:1:250033834	GW	0.4747	0.29	0.2353	0	0	0
PI601211:81N4HABXX:7:250033651	GW	0.4941	0.2591	0.2469	0	0	0
PI601438:81N4HABXX:6:250033530	GW	0.4104	0	0.5896	0	0	0
PI601562:81FENABXX:3:250034800	GW	0.3539	0	0.6461	0	0	0
PI601491:81N4HABXX:6:250033546	GW	0.5183	0.3019	0.1797	0	0	0
NSL243016:81N4HABXX:6:250033579	GW	0.4692	0.2207	0.3101	0	0	0
PI601492:81FE8ABXX:5:250032460	GW	0.5795	0.2696	0.1509	0	0	0
PI601377:81FENABXX:1:250033866	GW	0.6285	0.2606	0.1109	0	0	0
PI601563:81N4HABXX:6:250033533	GW	0.5556	0.2777	0.1667	0	0	0
Ames12814:81FE8ABXX:1:250031891	GW	0.2211	0.0298	0.7491	0	0	0
Ames12819:81FE8ABXX:1:250031873	GW	0.1185	0.0307	0.8509	0	0	0
Ames12821:81FE8ABXX:1:250031934	GW	0.1404	0.0609	0.7987	0	0	0
Ames12823:81N4HABXX:6:250033553	GW	0.1762	0.0278	0.796	0	0	0
NSL30903:81FENABXX:2:250034669	GW	0.1235	0.0681	0.8084	0	0	0
PI406106:81FE7ABXX:4:250031457	GW	0.4464	0	0.5535	0	0	0
PI221735:81N4HABXX:3:250033210	GW	0.0903	0.0792	0.8305	0	0	0
Ames23398:81FENABXX:2:250034722	GW	0.0886	0.0886	0.8229	0	0	0
Ames23402:81FENABXX:4:250034979	GW	0.1513	0.0496	0.7992	0	0	0
Ames23405:81FE8ABXX:6:250032535	GW	0.1335	0.028	0.8384	0	0	0
Ames23406:81FE8ABXX:5:250032412	GW	0.1295	0.0606	0.81	0	0	0
NSL81596:81FENABXX:3:250034882	GW	0.1097	0.0576	0.8327	0	0	0
Ames23408:81FENABXX:3:250034827	GW	0.1335	0.0798	0.7867	0	0	0
Ames23415:81FENABXX:2:250034736	GW	0.092	0.0555	0.8525	0	0	0
PI221811:81FENABXX:5:250035101	GW	0.0762	0.0819	0.8419	0	0	0
Ames23417:81FE8ABXX:5:250032420	GW	0.0766	0.0914	0.8319	0	0	0
Ames23423:81FE8ABXX:5:250032440	GW	0.0999	0.0766	0.8234	0	0	0
Ames23426:81FE8ABXX:5:250032399	GW	0.1229	0.0474	0.8297	0	0	0
Ames23430:81FE8ABXX:6:250032597	GW	0.1117	0.0869	0.8014	0	0	0
Ames23449:81FE8ABXX:6:250032536	GW	0.2297	0.0062	0.764	0	0	0
Ames23456:81N4HABXX:5:250033425	GW	0.1366	0.0426	0.8208	0	0	0
PI587139:81N4HABXX:6:250033566	GW	0.6994	0	0.3006	0	0	0
Ames23458:81N4HABXX:2:250033051	GW	0.6853	0	0.3147	0	0	0
Ames23461:81FE8ABXX:6:250032595	GW	0.1806	0.0423	0.7771	0	0	0
Ames23463:81FE8ABXX:5:250032436	GW	0.1679	0.0362	0.7958	0	0	0
Ames23464:81FE8ABXX:6:250032533	GW	0.1318	0.037	0.8312	0	0	0
PI587140:81FE8ABXX:1:250031900	GW	0.2317	0.0584	0.71	0	0	0
Ames23468:81FE8ABXX:6:250032510	GW	0.2308	0.06	0.7092	0	0	0
Ames23469:81FE8ABXX:1:250031880	GW	0.2283	0.0677	0.704	0	0	0
Ames23470:81N4HABXX:6:250033601	GW	0.2239	0.0586	0.7175	0	0	0
Ames19308:81N4HABXX:4:250033343	GW	0.2344	0.076	0.6895	0	0	0
Ames19309:81FE7ABXX:4:250031394	GW	0.2555	0.0662	0.6783	0	0	0
Ames23474:81FE8ABXX:5:250032426	GW	0.2644	0.0805	0.6552	0	0	0
Ames23478:81FE8ABXX:6:250032592	GW	0.1118	0.055	0.8333	0	0	0
Ames23479:81FE8ABXX:5:250032422	GW	0.1618	0.0411	0.797	0	0	0
Ames23480:81FE8ABXX:5:250032452	GW	0.2719	0.0014	0.7267	0	0	0
Ames23488:81FE8ABXX:6:250032572	GW	0.2777	0.0451	0.6771	0	0	0
NSL81599:81FENABXX:7:250034628	GW	0.1933	0.011	0.7957	0	0	0
NSL81600:81FENABXX:3:250034831	GW	0.2251	0.0072	0.7677	0	0	0
PI607523:81FE8ABXX:6:250032539	GW	0.0982	0.0893	0.8125	0	0	0
PI607524:81FE8ABXX:3:250032195	GW	0.2217	0.0701	0.7082	0	0	0
Ames23494:81FENABXX:3:250034838	GW	0.5176	0	0.4824	0	0	0
Ames23495:81FENABXX:7:250034605	GW	0.0672	0.0628	0.87	0	0	0
Ames23502:81FE8ABXX:6:250032598	GW	0.1204	0.0655	0.8141	0	0	0
Ames23503:81FE7ABXX:6:250031669	GW	0.7085	0.2813	0.0102	0	0	0
PI567794:81FE8ABXX:6:250032526	GW	0.0744	0.2372	0.6884	0	0	0
Ab18:81FENABXX:5:250035064	GW	0.0651	0.3976	0.5374	0	0	0
Ames22792:81FENABXX:3:250034854	GW	0.0957	0.1043	0.8	0	0	0
Ames28974:81FE7ABXX:5:250031546	GW	0.0587	0.363	0.5783	0	0	0
Ames28990:81FENABXX:5:250035123	GW	0.0696	0.4194	0.511	0	0	0
Ames28981:81N4HABXX:7:250033657	GW	0.0802	0.468	0.4518	0	0	0
Ames28985:81FENABXX:5:250035059	GW	0.0732	0.4464	0.4803	0	0	0
Ames28994:81FENABXX:4:250034931	GW	0.0697	0.4299	0.5005	0	0	0
Ames28995:81FE7ABXX:3:250031298	GW	0.0661	0.4028	0.5311	0	0	0
Ames28987:81FENABXX:4:250035015	GW	0.0638	0.4029	0.5333	0	0	0
Ames28988:81FENABXX:5:250035097	GW	0.0697	0.4243	0.5061	0	0	0
Ames28984:81FE7ABXX:3:250031266	GW	0.0685	0.424	0.5076	0	0	0
Ames28977:81FENABXX:2:250034683	GW	0.0669	0.4112	0.5219	0	0	0
Ames28991:81FE7ABXX:2:250031202	GW	0.0665	0.4165	0.517	0	0	0
Ames28996:81FE7ABXX:1:250030986	GW	0.0666	0.4069	0.5265	0	0	0
Ames28980:81FENABXX:2:250034716	GW	0.073	0.4412	0.4858	0	0	0
Ames28992:81FENABXX:4:250034972	GW	0.0673	0.4136	0.5191	0	0	0
Ames29030:81N4HABXX:7:250033707	GW	0.0599	0.3848	0.5553	0	0	0
Ames28986:81FENABXX:3:250034820	GW	0.0679	0.4162	0.5159	0	0	0
Ames28999:81FENABXX:1:250033777	GW	0.0902	0.5233	0.3865	0	0	0
Ames28989:81FE7ABXX:1:250031007	GW	0.0661	0.3677	0.5662	0	0	0
Ames29010:81FENABXX:1:250033808	GW	0.0642	0.4238	0.5119	0	0	0
Ames29011:81FE7ABXX:5:250031506	GW	0.0626	0.4135	0.5239	0	0	0
Ames29012:81FENABXX:1:250033827	GW	0.0627	0.4205	0.5168	0	0	0
Ames29013:81N4HABXX:6:250033604	GW	0.0648	0.4272	0.508	0	0	0
Ames29014:81FE7ABXX:5:250031528	GW	0.0677	0.4387	0.4936	0	0	0
Ames29015:81N4HABXX:6:250033606	GW	0.068	0.4368	0.4951	0	0	0
Ames29016:81N4HABXX:7:250033715	GW	0.0626	0.4048	0.5325	0	0	0
Ames29017:81FE7ABXX:5:250031561	GW	0.0627	0.4085	0.5288	0	0	0
Ames29018:81FE7ABXX:5:250031543	GW	0.0643	0.4144	0.5213	0	0	0
Ames29019:81FE7ABXX:4:250031448	GW	0.0659	0.4209	0.5133	0	0	0
Ames29002:81FE7ABXX:4:250031421	GW	0.059	0.3939	0.5471	0	0	0
Ames29020:81FE7ABXX:3:250031295	GW	0.069	0.4387	0.4922	0	0	0
Ames29021:81FE7ABXX:4:250031368	GW	0.0666	0.4255	0.5079	0	0	0
Ames29003:81FE7ABXX:6:250031705	GW	0.057	0.3858	0.5572	0	0	0
Ames29004:81FENABXX:2:250034706	GW	0.0589	0.3909	0.5501	0	0	0
Ames29005:81FE7ABXX:5:250031510	GW	0.0675	0.4348	0.4977	0	0	0
Ames29007:81N4HABXX:7:250033698	GW	0.0644	0.4264	0.5091	0	0	0
Ames29008:81FENABXX:2:250034712	GW	0.0655	0.4235	0.511	0	0	0
Ames29009:81FENABXX:1:250033795	GW	0.0658	0.4306	0.5036	0	0	0
Ames29022:81FE7ABXX:6:250031706	GW	0.0756	0.4496	0.4748	0	0	0
NSL437910:81FENABXX:4:250034992	GW	0.509	0.2816	0.2094	0	0	0
NSL437933:81FENABXX:4:250034963	GW	0.0855	0.0492	0.8653	0	0	0
NSL437934:81FENABXX:5:250035138	GW	0.0878	0.043	0.8692	0	0	0
NSL437962:81FE7ABXX:1:250030995	GW	0.3119	0.1066	0.5815	0	0	0
NSL437992:81FENABXX:6:250035203	GW	0.6576	0.2903	0.0521	0	0	0
NSL438019:81FENABXX:3:250034807	GW	0.4678	0.2686	0.2636	0	0	0
NSL438022:81FE7ABXX:2:250031166	GW	0.0939	0.0197	0.8864	0	0	0
NSL438034:81FENABXX:4:250034958	GW	0.5424	0.2576	0.2	0	0	0
NSL438036:81FE7ABXX:1:250031071	GW	0.3023	0	0.6977	0	0	0
PI340841:81FE7ABXX:2:250031170	GW	0.0775	0.4707	0.4518	0	0	0
PI340860:81N4HABXX:7:250033699	GW	0.0157	0.2346	0.7496	0	0	0
PI340838:81FE7ABXX:1:250031016	GW	0.0186	0.2132	0.7683	0	0	0
PI340839:81FE7ABXX:2:250031139	GW	0.045	0.2911	0.664	0	0	0
PI584529:81FENABXX:6:250035176	GW	0.2886	0	0.7114	0	0	0
PI594045:81FENABXX:2:250034759	GW	0.2795	0	0.7205	0	0	0
PI594048:81FENABXX:3:250034886	GW	0.2431	0.1393	0.6176	0	0	0
PI594049:81FE7ABXX:2:250031130	GW	0.0905	0.0471	0.8624	0	0	0
PI597925:81FE7ABXX:3:250031325	GW	0.0971	0.0207	0.8822	0	0	0
PI597926:81FE7ABXX:1:250031033	GW	0.1501	0.0557	0.7943	0	0	0
PI597927:81FE7ABXX:1:250030983	GW	0.6224	0.2996	0.078	0	0	0
PI607382:81FENABXX:4:250035011	GW	0.2223	0.1317	0.646	0	0	0
PI607383:81FE7ABXX:3:250031320	GW	0.1002	0.0773	0.8224	0	0	0
PI607384:81FE7ABXX:2:250031128	GW	0.0991	0.0212	0.8797	0	0	0
PI632746:81FE7ABXX:1:250031010	GW	0.1163	0.038	0.8457	0	0	0
NSL65866:81FE7ABXX:5:250031578	GW	0.3062	0.0756	0.6182	0	0	0
PI550461:81FE7ABXX:5:250031584	GW	0.3052	0.0754	0.6194	0	0	0
Ames27066:81FE8ABXX:7:250032840	GW	0.1147	0.0867	0.7986	0	0	0
PI550467:81FE7ABXX:1:250030985	GW	0.2101	0.0846	0.7053	0	0	0
NSL30046:81FENABXX:5:250035132	GW	0.0742	0.0153	0.9105	0	0	0
PI550469:81FE7ABXX:1:250030991	GW	0.1726	0.0257	0.8016	0	0	0
PI601009:81FE8ABXX:1:250031950	GW	0.179	0.0966	0.7245	0	0	0
PI608764:81FENABXX:4:250034944	GW	0.4239	0	0.5761	0	0	0
PI550472:81FENABXX:4:250034982	GW	0.0895	0.0744	0.8361	0	0	0
PI550462:81FE7ABXX:5:250031535	GW	0.2823	0.0718	0.6459	0	0	0
PI550455:81FENABXX:5:250035053	GW	0.2353	0.0977	0.6669	0	0	0
NSL65863:81FENABXX:1:250033778	GW	0.1351	0.0562	0.8087	0	0	0
PI550466:81FE7ABXX:3:250031293	GW	0.0888	0.0098	0.9014	0	0	0
PI550473:81FE7ABXX:6:250031665	GW	0.746	0.254	0	0	0	0
Ames8397:81FE7ABXX:5:250031568	GW	0.7113	0.2794	0.0093	0	0	0
Ames27065:81FE7ABXX:5:250031573	GW	0.7423	0.2577	0	0	0	0
PI608774:81N4HABXX:6:250033616	GW	0.2376	0.0104	0.7521	0	0	0
PI550483:81FE7ABXX:5:250031544	GW	0.1996	0.0859	0.7145	0	0	0
PI608765:81N4HABXX:7:250033664	GW	0.1001	0.0771	0.8228	0	0	0
PI608766:81FE7ABXX:6:250031646	GW	0.2724	0.013	0.7146	0	0	0
PI608777:81FE7ABXX:3:250031255	GW	0.1962	0.0142	0.7896	0	0	0
PI608768:81FENABXX:3:250034848	GW	0.1906	0.0164	0.7929	0	0	0
PI550556:81FENABXX:4:250035005	GW	0.1863	0.0764	0.7373	0	0	0
PI509542:81FENABXX:5:250035130	GW	0.2445	0.1252	0.6303	0	0	0
PI527700:81FE7ABXX:1:250031003	GW	0.1356	0.0364	0.8281	0	0	0
PI539870:81FE8ABXX:1:250031917	GW	0.1337	0.0027	0.8636	0	0	0
PI539871:81FE8ABXX:6:250032542	GW	0.1905	0.0019	0.8075	0	0	0
PI539872:81FENABXX:5:250035092	GW	0.2214	0.1328	0.6458	0	0	0
PI564682:81FENABXX:1:250033788	GW	0.1233	0.0384	0.8383	0	0	0
PI584528:81FE7ABXX:6:250031647	GW	0.1195	0.0238	0.8566	0	0	0
Ames2332:81FE7ABXX:4:250031367	GW	0.1645	0.0361	0.7994	0	0	0
Ames19284:81FE8ABXX:7:250032795	GW	0.034	0.0059	0.96	0	0	0
Ames19313:81N4HABXX:6:250033580	GW	0.052	0.0349	0.9131	0	0	0
PI221820:81FE7ABXX:6:250031661	GW	0.0669	0.1035	0.8296	0	0	0
Ames22441:81FE8ABXX:4:250032253	GW	0.1392	0.0456	0.8152	0	0	0
Ames27017:81FENABXX:3:250034866	GW	0.0961	0.0567	0.8473	0	0	0
Ames27018:81N4HABXX:5:250033460	GW	0.0637	0.0106	0.9257	0	0	0
Ames27019:81FE8ABXX:5:250032438	GW	0.2243	0.0895	0.6861	0	0	0
Ames27020:81FE8ABXX:6:250032550	GW	0.1992	0.0603	0.7405	0	0	0
PI391660:81FE7ABXX:5:250031559	GW	0.1305	0.0193	0.8502	0	0	0
Ames26120:81FENABXX:3:250034828	GW	0.1046	0.0582	0.8372	0	0	0
Ames26132:81FE7ABXX:2:250031125	GW	0.1057	0.0635	0.8308	0	0	0
Ames26134:81FENABXX:4:250034953	GW	0.1713	0.0494	0.7794	0	0	0
CIze45:81FENABXX:3:250034850	GW	0.1631	0.0502	0.7867	0	0	0
Ames22440:81FE7ABXX:1:250030998	GW	0.2354	0.0977	0.6669	0	0	0
CML116:81FE7ABXX:6:250031673	GW	0.1345	0.0297	0.8358	0	0	0
CML211:81FE7ABXX:5:250031534	GW	0.0791	0.069	0.8519	0	0	0
CML326:81FE7ABXX:7:250031780	GW	0.0992	0.096	0.8049	0	0	0
CML365:81N4HABXX:3:250033164	GW	0.0873	0.0785	0.8341	0	0	0
CML456:81N4HABXX:3:250033142	GW	0.1091	0.0982	0.7926	0	0	0
Ames27051:81FE8ABXX:4:250032283	GW	0.1806	0.0659	0.7535	0	0	0
Ames27053:81FE8ABXX:4:250032316	GW	0.2752	0.1385	0.5863	0	0	0
PI606329:81FE7ABXX:2:250031148	GW	0.1115	0.0075	0.881	0	0	0
PI638552:81FE7ABXX:1:250031002	GW	0.2105	0.0115	0.778	0	0	0
PI550558:81FE7ABXX:5:250031524	GW	0.199	0.0561	0.7449	0	0	0
PI601191:81FE7ABXX:6:250031638	GW	0.7349	0.2651	0	0	0	0
PI221747:81FE8ABXX:7:250032768	GW	0.0861	0.09	0.8238	0	0	0
PI601724:81FENABXX:2:250034748	GW	0.1503	0.0076	0.8421	0	0	0
Ames2330:81N4HABXX:6:250033592	GW	0.1184	0.048	0.8336	0	0	0
PI427109:81N4HABXX:6:250033593	GW	0.0933	0.0935	0.8131	0	0	0
Ames27112:81N4HABXX:2:250033030	GW	0.0866	0.0822	0.8311	0	0	0
PI257516:81FENABXX:6:250035244	GW	0.059	0.1652	0.7758	0	0	0
PI600958:81FE7ABXX:4:250031412	GW	0.2697	0.0921	0.6381	0	0	0
PI601439:81FE7ABXX:2:250031195	GW	0.2595	0.0996	0.6409	0	0	0
PI600772:81FENABXX:4:250034966	GW	0.1583	0.0462	0.7955	0	0	0
PI601037:81FE7ABXX:6:250031660	GW	0.1956	0.0507	0.7537	0	0	0
GA220:81FE8ABXX:4:250032266	GW	0.0944	0.0419	0.8637	0	0	0
Ames10254:81N4HABXX:3:250033198	GW	0.1022	0.0642	0.8336	0	0	0
PI511313:81FE7ABXX:7:250031752	GW	0.1195	0.1029	0.7776	0	0	0
PI511318:81FE7ABXX:7:250031754	GW	0.0577	0.1568	0.7855	0	0	0
Ames22748:81FE7ABXX:3:250031306	GW	0.2966	0.0703	0.6331	0	0	0
PI550497:81FE7ABXX:4:250031369	GW	0.099	0.0628	0.8383	0	0	0
Ames22749:81N4HABXX:7:250033672	GW	0.6187	0	0.3813	0	0	0
PI587127:81FE7ABXX:5:250031574	GW	0.1661	0.0778	0.7561	0	0	0
Ames26800:81FE7ABXX:5:250031557	GW	0.1969	0.0981	0.705	0	0	0
Ames19318:81FE7ABXX:4:250031436	GW	0.3333	0	0.6667	0	0	0
Ames26801:81FENABXX:1:250033801	GW	0.1033	0.0073	0.8894	0	0	0
Ames26802:81FENABXX:1:250033803	GW	0.113	0.0013	0.8857	0	0	0
PI550527:81N4HABXX:4:250033357	GW	0.2523	0.1007	0.647	0	0	0
Ames22750:81N4HABXX:6:250033560	GW	0.349	0	0.651	0	0	0
Ames26803:81N4HABXX:7:250033724	GW	0.1282	0.0831	0.7888	0	0	0
Ames22751:81N4HABXX:7:250033739	GW	0.2748	0.0399	0.6854	0	0	0
Ames26804:81FE7ABXX:5:250031495	GW	0.1431	0.0277	0.8292	0	0	0
Ames22753:81FE7ABXX:5:250031531	GW	0.5993	0.2952	0.1056	0	0	0
PI583846:81FENABXX:5:250035070	GW	0.0693	0.0123	0.9184	0	0	0
Ames26785:81FENABXX:1:250033820	GW	0.0842	0.0161	0.8997	0	0	0
Ames15929:81FENABXX:1:250033855	GW	0.0743	0.0136	0.9121	0	0	0
Ames26794:81FENABXX:2:250034719	GW	0.0763	0.0857	0.838	0	0	0
PI587128:81FE7ABXX:4:250031400	GW	0.1864	0.0899	0.7237	0	0	0
PI601610:81FE7ABXX:3:250031302	GW	0.2944	0.1392	0.5664	0	0	0
Ames26796:81FE7ABXX:4:250031437	GW	0.2195	0.0844	0.6962	0	0	0
Ames19319:81FE7ABXX:6:250031680	GW	0.4611	0	0.5389	0	0	0
Ames26798:81FE7ABXX:3:250031326	GW	0.4116	0	0.5884	0	0	0
PI587129:81FENABXX:2:250034734	GW	0.2609	0	0.739	0	0	0
PI601564:81FE8ABXX:5:250032383	GW	0.1596	0.0651	0.7753	0	0	0
PI601172:81FENABXX:5:250035080	GW	0.1079	0.0375	0.8546	0	0	0
PI587131:81FENABXX:4:250034929	GW	0.1573	0.8	0.0427	0	0	0
PI542776:81FENABXX:4:250034949	GW	0.0717	0.4421	0.4862	0	0	0
NSL30864:81FENABXX:2:250034698	GW	0.1991	0.0625	0.7385	0	0	0
I205:MRG:2:250040145	GW	0.1266	0.0404	0.833	0	0	0
Ames27115:81N4HABXX:5:250033453	GW	0.0308	0.2352	0.734	0	0	0
NSL75971:81FE7ABXX:6:250031664	GW	0.0198	0.2477	0.7325	0	0	0
Ames22025:81FENABXX:1:250033800	GW	0.0828	0.2664	0.6507	0	0	0
PI340875:81FE8ABXX:7:250032841	GW	0.0364	0.2083	0.7553	0	0	0
PI340876:81FE7ABXX:2:250031167	GW	0.0595	0.3551	0.5855	0	0	0
NSL75976:81FENABXX:4:250035004	GW	0.021	0.2503	0.7287	0	0	0
NSL75977:81FENABXX:2:250034755	GW	0.0652	0.4022	0.5326	0	0	0
Ames22030:81N4HABXX:6:250033617	GW	0.111	0.3359	0.5531	0	0	0
PI601208:81FE8ABXX:5:250032429	GW	0.1233	0.0012	0.8755	0	0	0
PI601565:81FE7ABXX:4:250031391	GW	0.1595	0.0305	0.81	0	0	0
PI601458:81FE8ABXX:1:250031890	GW	0.0609	0.0116	0.9275	0	0	0
PI601459:81FE8ABXX:6:250032594	GW	0.051	0.0087	0.9404	0	0	0
Ames24575:81FE7ABXX:1:250031070	GW	0.034	0.2738	0.6922	0	0	0
Ames24576:81FENABXX:4:250035010	GW	0.1123	0.6298	0.258	0	0	0
Ames24577:81FENABXX:4:250034969	GW	0.1115	0.6207	0.2677	0	0	0
Ames27120:81FE7ABXX:7:250031769	GW	0.0709	0.2365	0.6926	0	0	0
Ames27446:81N4HABXX:7:250033730	GW	0.0646	0.2124	0.7231	0	0	0
PI186227:81FE8ABXX:1:250031901	GW	0.0701	0.0771	0.8528	0	0	0
PI186218:81FENABXX:1:250033797	GW	0.0693	0.0821	0.8486	0	0	0
PI601725:81N4HABXX:6:250033600	GW	0.048	0.0077	0.9443	0	0	0
Ames27122:81FE8ABXX:7:250032762	GW	0.0986	0.0693	0.8322	0	0	0
NSL22630:81FENABXX:6:250035258	GW	0.1064	0.0755	0.8181	0	0	0
Ames22754:81FE7ABXX:5:250031565	GW	0.0975	0.0997	0.8028	0	0	0
NSL30863:81FE7ABXX:1:250031011	GW	0.101	0.0674	0.8316	0	0	0
NSL65873:81FE8ABXX:7:250032823	GW	0.0941	0.0561	0.8497	0	0	0
PI644101:81FE7ABXX:2:250031192	GW	0.1733	0.0466	0.7801	0	0	0
PI600954:81N4HABXX:5:250033455	GW	0.6612	0.301	0.0378	0	0	0
PI601079:81FE7ABXX:4:250031456	GW	0.2964	0	0.7036	0	0	0
PI538007:81FE8ABXX:7:250032771	GW	0.2407	0	0.7593	0	0	0
PI547086-1:81FENABXX:7:250034631	GW	0.087	0.0233	0.8897	0	0	0
PI601004:81N4HABXX:6:250033532	GW	0.6348	0.2928	0.0725	0	0	0
PI539922:81FE7ABXX:4:250031430	GW	0.6127	0.2917	0.0955	0	0	0
PI539926:81N4HABXX:6:250033572	GW	0.5333	0.3286	0.1381	0	0	0
PI539927:81FE7ABXX:4:250031434	GW	0.5858	0.3276	0.0865	0	0	0
PI539923:81FENABXX:2:250034739	GW	0.579	0.2753	0.1457	0	0	0
PI537097:81FENABXX:1:250033872	GW	0.5897	0.262	0.1483	0	0	0
PI538009:81FENABXX:1:250033869	GW	0.6497	0.2886	0.0618	0	0	0
PI537099:81FE7ABXX:4:250031441	GW	0.5728	0.2904	0.1368	0	0	0
PI547088-1:81FENABXX:7:250034564	GW	0.4702	0.218	0.3118	0	0	0
PI538011:81FE7ABXX:4:250031414	GW	0.3839	0.1991	0.4169	0	0	0
PI600791:81N4HABXX:5:250033467	GW	0.6193	0	0.3807	0	0	0
PI600944:81N4HABXX:1:250032906	GW	0.6058	0	0.3942	0	0	0
PI600955:81FE7ABXX:4:250031416	GW	0.0717	0.0102	0.9181	0	0	0
PI601317:81FENABXX:1:250033829	GW	0.1351	0.0023	0.8626	0	0	0
PI601466:81FE8ABXX:3:250032185	GW	0.1508	0.0018	0.8474	0	0	0
PI601404:81N4HABXX:1:250032892	GW	0.0631	0.0135	0.9233	0	0	0
PI601494:81N4HABXX:6:250033535	GW	0.0566	0.011	0.9324	0	0	0
PI600957:81FE8ABXX:5:250032450	GW	0.5129	0.2686	0.2185	0	0	0
PI601170:81FE8ABXX:6:250032540	GW	0.0999	0.0329	0.8671	0	0	0
PI601171:81N4HABXX:7:250033705	GW	0.149	0.0485	0.8025	0	0	0
PI600755:81FENABXX:2:250034718	GW	0.2636	0.0719	0.6646	0	0	0
PI600729:81FE7ABXX:4:250031458	GW	0.2636	0.0709	0.6655	0	0	0
NSL30867:81FE8ABXX:1:250031956	GW	0.1908	0.015	0.7942	0	0	0
PI601209:81FE7ABXX:4:250031398	GW	0.1601	0.0058	0.834	0	0	0
PI601440:81FENABXX:1:250033864	GW	0.3475	0	0.6525	0	0	0
PI601566:81FE7ABXX:3:250031261	GW	0.5255	0	0.4745	0	0	0
PI600956:81FE7ABXX:5:250031548	GW	0.2291	0	0.7709	0	0	0
Ames26004:81N4HABXX:5:250033478	GW	0.0487	0.1949	0.7564	0	0	0
PI583774:81FENABXX:3:250034846	GW	0.5016	0	0.4984	0	0	0
PI558518:81N4HABXX:1:250032900	GW	0.1042	0.0646	0.8312	0	0	0
PI558532:81FE7ABXX:4:250031418	GW	0.0517	0.0093	0.939	0	0	0
PI558520:81FE8ABXX:7:250032816	GW	0.0745	0.0186	0.9069	0	0	0
Ames28361:81FE7ABXX:1:250031072	GW	0.0747	0.0155	0.9098	0	0	0
Ames20120:81FE7ABXX:2:250031157	GW	0.0567	0.0112	0.9321	0	0	0
PI583350:81FE7ABXX:4:250031424	GW	0.0876	0.0539	0.8585	0	0	0
PI583351:81FE7ABXX:5:250031560	GW	0.1048	0.0319	0.8633	0	0	0
PI583352:81N4HABXX:7:250033675	GW	0.1063	0.0751	0.8185	0	0	0
PI634206:81FENABXX:2:250034710	GW	0.1346	0.0646	0.8008	0	0	0
PI634207:81FE7ABXX:5:250031551	GW	0.1536	0.0501	0.7963	0	0	0
Ames28947:81FENABXX:5:250035142	GW	0.0733	0.0808	0.8459	0	0	0
Ames22442:81FE8ABXX:6:250032551	GW	0.1612	0.0365	0.8023	0	0	0
Ames24729:81N4HABXX:6:250033552	GW	0.0967	0.084	0.8193	0	0	0
Ames24730:81N4HABXX:3:250033197	GW	0.1404	0.0245	0.8351	0	0	0
Ames24737:81FE8ABXX:5:250032445	GW	0.1295	0.0524	0.8181	0	0	0
Ames24739:81N4HABXX:6:250033603	GW	0.1807	0.0185	0.8008	0	0	0
Ames24742:81FE8ABXX:5:250032447	GW	0.1005	0.0998	0.7997	0	0	0
Ames24743:81FE8ABXX:6:250032553	GW	0.1557	0.019	0.8254	0	0	0
Ames24744:81FENABXX:4:250034928	GW	0.1372	0.067	0.7958	0	0	0
Ames24746:81FENABXX:7:250034629	GW	0.2886	0.0471	0.6643	0	0	0
Ames24748:81FE8ABXX:6:250032522	GW	0.1463	0.0444	0.8093	0	0	0
Ames24749:81FENABXX:3:250034839	GW	0.2997	0.0044	0.6959	0	0	0
Ames24751:81FE8ABXX:5:250032432	GW	0.1885	0.0213	0.7902	0	0	0
Ames24707:81FENABXX:2:250034758	GW	0.085	0.0692	0.8458	0	0	0
Ames24709:81FE8ABXX:6:250032528	GW	0.3578	0	0.6422	0	0	0
Ames24711:81FE8ABXX:6:250032545	GW	0.3098	0	0.6902	0	0	0
Ames24712:81N4HABXX:6:250033531	GW	0.1181	0.0679	0.814	0	0	0
Ames24713:81FENABXX:3:250034804	GW	0.1405	0.0541	0.8053	0	0	0
Ames24717:81FE8ABXX:6:250032544	GW	0.2194	0.0499	0.7307	0	0	0
Ames24720:81FE8ABXX:4:250032290	GW	0.0922	0.0751	0.8327	0	0	0
Ames24721:81FENABXX:3:250034871	GW	0.3051	0.0099	0.6851	0	0	0
PI550566:81N4HABXX:6:250033594	GW	0.6225	0.2323	0.1452	0	0	0
PI568158:81N4HABXX:7:250033741	GW	0.1147	0.0461	0.8391	0	0	0
PI568159:81FE8ABXX:5:250032406	GW	0.1022	0.0599	0.8379	0	0	0
PI595366:81FENABXX:3:250034822	GW	0.2813	0.0978	0.6209	0	0	0
PI596355:81FE8ABXX:5:250032414	GW	0.1313	0.0313	0.8374	0	0	0
PI596356:81FE8ABXX:5:250032396	GW	0.2787	0.0856	0.6357	0	0	0
Ames27138:81FE7ABXX:5:250031505	GW	0.2261	0.1015	0.6724	0	0	0
PI594050:81N4HABXX:6:250033561	GW	0.2924	0.1204	0.5872	0	0	0
PI594051:81FE8ABXX:1:250031945	GW	0.297	0.117	0.586	0	0	0
PI594052:81FE8ABXX:1:250031902	GW	0.2467	0.0984	0.655	0	0	0
PI594054:81FE8ABXX:4:250032289	GW	0.2186	0.0795	0.7019	0	0	0
PI594058:81N4HABXX:2:250033045	GW	0.2532	0.0929	0.6539	0	0	0
PI594062:81N4HABXX:6:250033525	GW	0.2218	0.0883	0.6899	0	0	0
PI594065:81FE8ABXX:1:250031946	GW	0.2265	0.0906	0.683	0	0	0
PI594070:81N4HABXX:6:250033578	GW	0.2601	0.0942	0.6456	0	0	0
PI594071:81FE8ABXX:1:250031914	GW	0.2137	0.1024	0.6839	0	0	0
PI594072:81FE8ABXX:1:250031957	GW	0.2713	0.1104	0.6183	0	0	0
PI594076:81N4HABXX:6:250033586	GW	0.12	0.0306	0.8494	0	0	0
PI594077:81FE8ABXX:1:250031893	GW	0.1211	0.0384	0.8405	0	0	0
PI594078:81FE8ABXX:1:250031940	GW	0.1131	0.0292	0.8577	0	0	0
PI594079:81FE8ABXX:4:250032321	GW	0.1154	0.0329	0.8517	0	0	0
PI594080:81FE8ABXX:1:250031961	GW	0.1154	0.0448	0.8398	0	0	0
PI594089:81FE8ABXX:1:250031921	GW	0.2192	0.0872	0.6936	0	0	0
PI597578:81N4HABXX:6:250033591	GW	0.1354	0.0633	0.8013	0	0	0
PI638549:81N4HABXX:6:250033574	GW	0.3572	0.1433	0.4994	0	0	0
PI638550:81FE8ABXX:5:250032446	GW	0.2363	0.0867	0.677	0	0	0
Ames27137:81N4HABXX:7:250033666	GW	0.091	0.1051	0.8038	0	0	0
PI221743:81FE8ABXX:6:250032602	GW	0.078	0.0879	0.834	0	0	0
PI607512:81FENABXX:2:250034717	GW	0.1993	0.0643	0.7365	0	0	0
PI592741:81FENABXX:1:250033859	GW	0.2169	0.1409	0.6423	0	0	0
Ames12732:81N4HABXX:1:250032896	GW	0.0836	0.0565	0.8599	0	0	0
PI550555:81FENABXX:1:250033796	GW	0.1722	0.0979	0.7298	0	0	0
PI511309:81FENABXX:1:250033819	GW	0.7167	0.2833	0	0	0	0
PI511310:81FE7ABXX:3:250031269	GW	0.6877	0.2998	0.0125	0	0	0
PI511311:81FENABXX:2:250034705	GW	0.723	0.2631	0.0139	0	0	0
Ames27140:81FENABXX:4:250034930	GW	0.1031	0.0424	0.8544	0	0	0
PI531085:81FENABXX:2:250034667	GW	0.0558	0.0225	0.9216	0	0	0
Ames28412:81FE7ABXX:6:250031628	GW	0.0539	0.0263	0.9198	0	0	0
Ames28417:81FE7ABXX:2:250031131	GW	0.377	0.2611	0.3619	0	0	0
Ames28419:81FENABXX:4:250034961	GW	0.5326	0.3335	0.1339	0	0	0
Ames28420:81FE7ABXX:3:250031283	GW	0.5475	0.3355	0.117	0	0	0
Ames28421:81FE7ABXX:1:250030990	GW	0.7089	0.2911	0	0	0	0
Ames28422:81FENABXX:3:250034799	GW	0.7029	0.2908	0.0064	0	0	0
Ames28423:81FE7ABXX:2:250031111	GW	0.661	0.3012	0.0378	0	0	0
Ames28425:81FENABXX:3:250034861	GW	0.0729	0.0296	0.8975	0	0	0
Ames28426:81FENABXX:5:250035125	GW	0.0577	0.0207	0.9216	0	0	0
Ames27141:81FE7ABXX:3:250031331	GW	0.0533	0.0246	0.9221	0	0	0
Ames27142:81FENABXX:1:250033784	GW	0.7378	0.2588	0.0034	0	0	0
Ames27147:81N4HABXX:2:250033039	GW	0.09	0.0731	0.8368	0	0	0
Ames27150:81FE7ABXX:2:250031126	GW	0.576	0.2863	0.1377	0	0	0
Ames27151:81FENABXX:4:250034926	GW	0.6747	0.2655	0.0598	0	0	0
Ames27160:81FE7ABXX:3:250031274	GW	0.685	0.2753	0.0397	0	0	0
Ames27161:81FE7ABXX:3:250031303	GW	0.729	0.2631	0.0079	0	0	0
Ames27167:81FE7ABXX:1:250031050	GW	0.0608	0.0262	0.9131	0	0	0
Ames27168:81FE7ABXX:6:250031622	GW	0.0652	0.0201	0.9147	0	0	0
Ames27178:81N4HABXX:7:250033696	GW	0.0585	0.0547	0.8868	0	0	0
Ames27182:81FE7ABXX:5:250031570	GW	0.7146	0.2854	0	0	0	0
PI607527:81FE8ABXX:4:250032264	GW	0.102	0.0654	0.8326	0	0	0
NSL32736:81FENABXX:6:250035212	GW	0.098	0.1027	0.7994	0	0	0
PI303929:81FE8ABXX:7:250032848	GW	0.1081	0.0754	0.8165	0	0	0
PI303930:81FE7ABXX:3:250031319	GW	0.1743	0.0506	0.775	0	0	0
PI303932:81FE8ABXX:1:250031932	GW	0.0841	0.0771	0.8388	0	0	0
PI303933:81FE8ABXX:6:250032531	GW	0.0756	0.0817	0.8427	0	0	0
PI303940:81FE7ABXX:3:250031280	GW	0.0737	0.0658	0.8605	0	0	0
PI303941:81FE7ABXX:6:250031697	GW	0.1047	0.0809	0.8144	0	0	0
PI542715:81FE8ABXX:1:250031926	GW	0.0594	0.3614	0.5792	0	0	0
PI542716:81N4HABXX:5:250033423	GW	0.0672	0.3911	0.5417	0	0	0
PI601417:81FE7ABXX:5:250031507	GW	0.6038	0.2732	0.1229	0	0	0
PI200189:81FE8ABXX:6:250032514	GW	0.0914	0.0838	0.8248	0	0	0
PI610494:81FENABXX:1:250033842	GW	0.1488	0.064	0.7872	0	0	0
PI561695:81FENABXX:2:250034735	GW	0.1239	0.0801	0.796	0	0	0
PI561694:81FE8ABXX:6:250032563	GW	0.1062	0.0127	0.8812	0	0	0
PI553063:81FE7ABXX:4:250031393	GW	0.0898	0.2408	0.6694	0	0	0
PI596499:81FE7ABXX:4:250031409	GW	0.0454	0.1945	0.76	0	0	0
PI596501:81FE7ABXX:3:250031262	GW	0.0742	0.1493	0.7765	0	0	0
PI596502:81FE7ABXX:5:250031493	GW	0.077	0.115	0.808	0	0	0
PI596503:81FENABXX:2:250034676	GW	0.0604	0.2067	0.7329	0	0	0
PI553056:81FE7ABXX:3:250031329	GW	0.0734	0.1649	0.7618	0	0	0
PI553058:81FE7ABXX:5:250031569	GW	0.0733	0.4463	0.4804	0	0	0
PI553060:81N4HABXX:7:250033673	GW	0.0591	0.3851	0.5557	0	0	0
PI553061:81FE7ABXX:4:250031406	GW	0.0376	0.1982	0.7642	0	0	0
NSL28965:81FE7ABXX:5:250031552	GW	0.1121	0.0474	0.8405	0	0	0
NSL28966:81N4HABXX:6:250033589	GW	0.4125	0	0.5875	0	0	0
NSL68211:81N4HABXX:6:250033607	GW	0.0925	0.0793	0.8282	0	0	0
Ames19288:81FE8ABXX:5:250032389	GW	0.9547	0	0.0453	0	0	0
NSL28967:81N4HABXX:5:250033491	GW	0.1291	0.0438	0.8271	0	0	0
PI573098:81N4HABXX:6:250033558	GW	0.0959	0.0244	0.8797	0	0	0
NSL28968:81FENABXX:7:250034567	GW	0.1101	0.0852	0.8046	0	0	0
NSL65874:81N4HABXX:6:250033613	GW	0.1109	0.0832	0.8059	0	0	0
Ames22756:81FE8ABXX:1:250031925	GW	0.1332	0.0648	0.802	0	0	0
Ames22048:81FENABXX:3:250034795	GW	0.137	0.4046	0.4584	0	0	0
Ames22049:81FE7ABXX:4:250031435	GW	0.1006	0.3146	0.5847	0	0	0
PI644102:81FE8ABXX:6:250032527	GW	0.1128	0.2352	0.652	0	0	0
PI531081:81FENABXX:2:250034682	GW	0.1237	0.045	0.8313	0	0	0
PI531082:81FENABXX:3:250034797	GW	0.0902	0.0991	0.8107	0	0	0
Ames22757:81N4HABXX:6:250033587	GW	0.182	0.0502	0.7678	0	0	0
PI517971:81N4HABXX:1:250032940	GW	0.0798	0.0579	0.8623	0	0	0
PI560074:81FE7ABXX:5:250031492	GW	0.2609	0.063	0.676	0	0	0
PI560075:81N4HABXX:7:250033668	GW	0.2607	0.0619	0.6775	0	0	0
Ames27184:81FE7ABXX:5:250031512	GW	0.6112	0	0.3888	0	0	0
PI560081:81FENABXX:1:250033791	GW	0.0803	0.0175	0.9021	0	0	0
Ames19324:81FE7ABXX:2:250031199	GW	0.418	0	0.582	0	0	0
Ames27185:81FE7ABXX:5:250031571	GW	0.1029	0.0695	0.8276	0	0	0
PI517972:81FE7ABXX:2:250031155	GW	0.1098	0.0601	0.8302	0	0	0
PI587147:81FE7ABXX:1:250031030	GW	0.2222	0.0036	0.7742	0	0	0
PI601441:81FE7ABXX:1:250031013	GW	0.6925	0.2708	0.0367	0	0	0
PHB47:C00R8ABXX:2:250007187	GW	0.1782	0.0981	0.7237	0	0	0
PI601270:81FENABXX:1:250033857	GW	0.0532	0.0083	0.9386	0	0	0
PI601008-1:81FENABXX:7:250034598	GW	0.05	0.0111	0.9389	0	0	0
PI600981:81FENABXX:1:250033863	GW	0.1903	0.0554	0.7542	0	0	0
PI601006:81FE7ABXX:5:250031516	GW	0.0617	0.2114	0.7269	0	0	0
PI601150:81FE8ABXX:5:250032418	GW	0.1905	0.0421	0.7674	0	0	0
PI601229:81FE7ABXX:5:250031564	GW	0.056	0.0097	0.9343	0	0	0
PI601320:81FENABXX:4:250034941	GW	0.08	0.0254	0.8947	0	0	0
PI601442:81FENABXX:4:250034937	GW	0.5367	0.2716	0.1917	0	0	0
PI601567:81FE7ABXX:4:250031452	GW	0.0665	0.0121	0.9214	0	0	0
PI601773:81FE7ABXX:5:250031508	GW	0.094	0.0325	0.8734	0	0	0
PI601774:81N4HABXX:5:250033402	GW	0.0681	0.0149	0.917	0	0	0
PI601775:81FENABXX:1:250033835	GW	0.5235	0.0973	0.3791	0	0	0
PI601468:81FENABXX:2:250034700	GW	0.3729	0.1758	0.4513	0	0	0
PI601777:81FE8ABXX:1:250031875	GW	0.4017	0.149	0.4493	0	0	0
PI601495:81FENABXX:1:250033811	GW	0.0542	0.0092	0.9366	0	0	0
PI601778:81FENABXX:3:250034821	GW	0.1115	0.0249	0.8636	0	0	0
PI601568:81FE7ABXX:2:250031201	GW	0.1094	0.0051	0.8855	0	0	0
PI601497:81FE7ABXX:1:250030994	GW	0.064	0.0111	0.9249	0	0	0
PI601780:81FE8ABXX:1:250031918	GW	0.3102	0.1862	0.5036	0	0	0
PI601782:81N4HABXX:5:250033466	GW	0.258	0	0.742	0	0	0
PI601783:81FE7ABXX:6:250031695	GW	0.0625	0.0109	0.9266	0	0	0
PI601570:81FE8ABXX:5:250032468	GW	0.0698	0.0127	0.9175	0	0	0
PI601784:81FE8ABXX:1:250031952	GW	0.0848	0.0167	0.8985	0	0	0
PI601361:81FENABXX:6:250035224	GW	0.0884	0.0701	0.8416	0	0	0
PI601572:81FENABXX:1:250033785	GW	0.2771	0.0103	0.7126	0	0	0
PI601786:81FE7ABXX:4:250031411	GW	0.0526	0.0107	0.9367	0	0	0
PI601573:81FENABXX:6:250035223	GW	0.4837	0.257	0.2593	0	0	0
PI601788:81FE7ABXX:2:250031142	GW	0.1557	0.0033	0.8411	0	0	0
PI601498:81FENABXX:1:250033853	GW	0.1964	0.0639	0.7397	0	0	0
PI601574:81FENABXX:4:250035000	GW	0.384	0	0.616	0	0	0
PI601499:81FE7ABXX:2:250031159	GW	0.2048	0	0.7952	0	0	0
PI601470:81FE8ABXX:1:250031962	GW	0.0774	0.0149	0.9077	0	0	0
PI601362:81FE7ABXX:3:250031285	GW	0.5307	0.2643	0.205	0	0	0
PI601791:81FENABXX:4:250034985	GW	0.1007	0.0787	0.8206	0	0	0
PI601792:81FENABXX:5:250035083	GW	0.2282	0.0013	0.7705	0	0	0
PI601575:81FENABXX:5:250035073	GW	0.4158	0.1561	0.4281	0	0	0
PI601501:81FE7ABXX:3:250031271	GW	0.114	0.0022	0.8839	0	0	0
PI601576:81FE7ABXX:3:250031247	GW	0.1108	0.0218	0.8674	0	0	0
PI601322-1:81FENABXX:7:250034578	GW	0.0847	0.0249	0.8904	0	0	0
PI601190:81FE8ABXX:5:250032427	GW	0.0482	0.0084	0.9434	0	0	0
NSL30878:81FE7ABXX:4:250031427	GW	0.1445	0.0248	0.8307	0	0	0
NSL30879:81FENABXX:1:250033849	GW	0.0994	0.041	0.8596	0	0	0
NSL242484:81FENABXX:1:250033779	GW	0.1193	0.0537	0.827	0	0	0
NSL30883:81FENABXX:2:250034677	GW	0.1533	0.019	0.8277	0	0	0
NSL30888:81FE7ABXX:5:250031572	GW	0.1492	0.0239	0.8268	0	0	0
NSL30890:81N4HABXX:7:250033678	GW	0.1708	0.0167	0.8125	0	0	0
Ames19326:81N4HABXX:5:250033412	GW	0.1224	0.0456	0.832	0	0	0
NSL30894:81FE7ABXX:4:250031446	GW	0.1953	0.0038	0.8009	0	0	0
NSL30896:81FENABXX:1:250033826	GW	0.1742	0.0216	0.8042	0	0	0
NSL30898:81FE7ABXX:4:250031405	GW	0.1524	0.0303	0.8172	0	0	0
NSL30902:81FE7ABXX:3:250031243	GW	0.1036	0.0727	0.8237	0	0	0
NSL30865:81FENABXX:2:250034744	GW	0.1458	0.0499	0.8044	0	0	0
NSL29317:81FE8ABXX:1:250031882	GW	0.1295	0.0624	0.808	0	0	0
Ames27187:81FENABXX:5:250035087	GW	0.2086	0.0163	0.7751	0	0	0
NSL30872:81FENABXX:1:250033847	GW	0.146	0.0182	0.8358	0	0	0
NSL30876:81FENABXX:1:250033813	GW	0.1022	0.0697	0.828	0	0	0
NSL117226:81FE7ABXX:4:250031402	GW	0.1977	0.0983	0.704	0	0	0
NSL30907:81FENABXX:2:250034756	GW	0.1782	0.0205	0.8013	0	0	0
NSL30908:81N4HABXX:7:250033684	GW	0.1135	0.0688	0.8177	0	0	0
PI340846:81FE7ABXX:6:250031707	GW	0.0787	0.4746	0.4467	0	0	0
PI369442:81FENABXX:6:250035263	GW	0.187	0.0166	0.7963	0	0	0
PI601612:81FE7ABXX:4:250031380	GW	0.0739	0.0162	0.9099	0	0	0
Ames27188:81FE7ABXX:2:250031181	GW	0.0647	0.4043	0.5311	0	0	0
NSL30835:81FENABXX:2:250034702	GW	0.1067	0.0705	0.8228	0	0	0
PI533659:81N4HABXX:4:250033273	GW	0.2183	0.0154	0.7663	0	0	0
PI606768:81FENABXX:3:250034808	GW	0.1479	0.0284	0.8238	0	0	0
PI606769:81FE8ABXX:5:250032407	GW	0.1029	0.0196	0.8775	0	0	0
PI508277:81FENABXX:3:250034860	GW	0.1578	0.0998	0.7425	0	0	0
PI524969:81FENABXX:2:250034681	GW	0.1275	0.0189	0.8536	0	0	0
PI524970:81FE8ABXX:5:250032455	GW	0.1341	0.0262	0.8397	0	0	0
PI538237:81FE8ABXX:4:250032330	GW	0.1966	0.0777	0.7257	0	0	0
PI600751:81N4HABXX:7:250033671	GW	0.0507	0.0092	0.9401	0	0	0
NSL75980:81FE7ABXX:6:250031657	GW	0.0657	0.3959	0.5384	0	0	0
Sg1533:MRG:2:250040200	GW	0.0754	0.449	0.4756	0	0	0
PI358521:81FENABXX:5:250035085	GW	0.0799	0.2646	0.6555	0	0	0
PI358530:81FE7ABXX:4:250031432	GW	0.0682	0.2439	0.6879	0	0	0
PI358534:81FENABXX:2:250034713	GW	0.0912	0.2871	0.6217	0	0	0
PI391663:81N4HABXX:1:250032921	GW	0.0816	0.0806	0.8377	0	0	0
PI340827:81FENABXX:7:250034560	GW	0.0847	0.0977	0.8176	0	0	0
PI550521:81FE8ABXX:7:250032854	GW	0.0877	0.0216	0.8907	0	0	0
PI550522:81FE8ABXX:7:250032844	GW	0.0928	0.1102	0.797	0	0	0
PI340830:81FENABXX:2:250034707	GW	0.0978	0.1596	0.7426	0	0	0
PI509045:81N4HABXX:2:250033023	GW	0.0669	0.2231	0.71	0	0	0
PI550518:81FE8ABXX:7:250032792	GW	0.0811	0.0402	0.8787	0	0	0
PI267171:81FENABXX:6:250035250	GW	0.1456	0.0446	0.8098	0	0	0
Ames26022:81FENABXX:1:250033814	GW	0.2266	0.0587	0.7148	0	0	0
Tx204:81FE8ABXX:7:250032767	GW	0.3055	0.0136	0.6809	0	0	0
Tx205:81N4HABXX:1:250032935	GW	0.3248	0.0136	0.6616	0	0	0
PI391678:81FE7ABXX:4:250031455	GW	0.097	0.0756	0.8274	0	0	0
PI587151:81FE8ABXX:1:250031935	GW	0.0769	0.0311	0.892	0	0	0
Ames19001:81FENABXX:3:250034888	GW	0.2192	0.0055	0.7753	0	0	0
Ames19002:81N4HABXX:2:250033017	GW	0.0662	0.0119	0.9219	0	0	0
Ames19003:81N4HABXX:3:250033145	GW	0.2231	0.0035	0.7734	0	0	0
Ames19328:81FE7ABXX:5:250031547	GW	0.0732	0.0167	0.9101	0	0	0
PI587149:81FE8ABXX:1:250031958	GW	0.5878	0	0.4122	0	0	0
PI587150:81FE7ABXX:5:250031501	GW	0.0682	0.0212	0.9105	0	0	0
Ames19014:81N4HABXX:7:250033702	GW	0.0644	0.0133	0.9223	0	0	0
Ames19016:81FE7ABXX:3:250031305	GW	0.0564	0.0154	0.9281	0	0	0
Ames27193:81FE7ABXX:5:250031520	GW	0.2136	0.0071	0.7793	0	0	0
Ames19019:81FENABXX:1:250033836	GW	0.0771	0.0153	0.9076	0	0	0
Ames24989:81N4HABXX:7:250033695	GW	0.2023	0.0162	0.7815	0	0	0
Ames19000:81FE7ABXX:3:250031259	GW	0.2364	0.0058	0.7578	0	0	0
Ames22052:81FE8ABXX:4:250032312	GW	0.1063	0.323	0.5708	0	0	0
Ames22053:81FENABXX:3:250034856	GW	0.0892	0.3007	0.6101	0	0	0
Ames22060:81FENABXX:7:250034542	GW	0.1049	0.3087	0.5863	0	0	0
NSL30053:81FE7ABXX:6:250031621	GW	0.1379	0.0182	0.8438	0	0	0
PI520772:81FENABXX:7:250034593	GW	0.2036	0.0455	0.751	0	0	0
NSL30058:81FENABXX:1:250033846	GW	0.0885	0.0164	0.8952	0	0	0
PI601502:81N4HABXX:6:250033565	GW	0.638	0.3081	0.054	0	0	0
WD456:81FE8ABXX:6:250032530	GW	0.1438	0.0559	0.8002	0	0	0
Ames19293:81FE7ABXX:5:250031532	GW	0.0624	0.0122	0.9254	0	0	0
PI601685:81FE7ABXX:4:250031428	GW	0.0614	0.0146	0.9239	0	0	0
NSL30066:81FE8ABXX:5:250032454	GW	0.0879	0.0751	0.837	0	0	0
Ames26742:81N4HABXX:7:250033733	GW	0.094	0.086	0.82	0	0	0
Ames26745:81FENABXX:1:250033805	GW	0.1346	0.0458	0.8196	0	0	0
Ames26747:81FE7ABXX:6:250031650	GW	0.1574	0.056	0.7867	0	0	0
Ames26750:81FE7ABXX:3:250031251	GW	0.0527	0.1232	0.8241	0	0	0
PI391682:81N4HABXX:6:250033536	GW	0.0802	0.0697	0.8501	0	0	0
PI391665:81FE8ABXX:6:250032589	GW	0.0845	0.0827	0.8328	0	0	0
Ames2333:81FE8ABXX:1:250031874	GW	0.0796	0.0914	0.829	0	0	0
Z010E0002:628NVAAXX:6:250023405	JL	0	0	0	0	1	0
Z010E0006:628NVAAXX:7:250023456	JL	0	0	0	0	1	0
Z010E0007:628NVAAXX:7:250023468	JL	0	0	0	0	1	0
Z010E0009:628NVAAXX:6:250023382	JL	0	0	0	0	1	0
Z010E0010:628NVAAXX:6:250023394	JL	0	0	0	0	1	0
Z010E0011:628NVAAXX:6:250023406	JL	0	0	0	0	1	0
Z010E0012:628NVAAXX:6:250023418	JL	0	0	0	0	1	0
Z010E0013:628NVAAXX:7:250023445	JL	0	0	0	0	1	0
Z010E0015:628NVAAXX:7:250023469	JL	0	0	0	0	1	0
Z010E0016:628NVAAXX:7:250023481	JL	0	0	0	0	1	0
Z010E0018:628NVAAXX:6:250023395	JL	0	0	0	0	1	0
Z010E0019:628NVAAXX:6:250023407	JL	0	0	0	0	1	0
Z010E0020:627C3AAXX:4:250028696	JL	0	0	0	0	1	0
Z010E0021:628NVAAXX:7:250023446	JL	0	0	0	0	1	0
Z010E0022:628NVAAXX:7:250023458	JL	0	0	0	0	1	0
Z010E0025:628NVAAXX:6:250023384	JL	0	0	0	0	1	0
Z010E0026:628NVAAXX:6:250023396	JL	0	0	0	0	1	0
Z010E0027:628NVAAXX:6:250023408	JL	0	0	0	0	1	0
Z010E0028:627C3AAXX:4:250028720	JL	0	0	0	0	1	0
Z010E0029:628NVAAXX:7:250023447	JL	0	0	0	0	1	0
Z010E0032:628NVAAXX:7:250023483	JL	0	0	0	0	1	0
Z010E0033:627C3AAXX:4:250028672	JL	0	0	0	0	1	0
Z010E0034:627C3AAXX:4:250028645	JL	0	0	0	0	1	0
Z010E0035:628NVAAXX:6:250023409	JL	0	0	0	0	1	0
Z010E0037:628NVAAXX:7:250023448	JL	0	0	0	0	1	0
Z010E0038:628NVAAXX:7:250023460	JL	0	0	0	0	1	0
Z010E0039:628NVAAXX:7:250023472	JL	0	0	0	0	1	0
Z010E0040:628NVAAXX:7:250023484	JL	0	0	0	0	1	0
Z010E0041:628NVAAXX:6:250023386	JL	0	0	0	0	1	0
Z010E0042:628NVAAXX:6:250023398	JL	0	0	0	0	1	0
Z010E0043:627C3AAXX:4:250028653	JL	0	0	0	0	1	0
Z010E0044:628NVAAXX:6:250023422	JL	0	0	0	0	1	0
Z010E0046:628NVAAXX:7:250023461	JL	0	0	0	0	1	0
Z010E0047:628NVAAXX:7:250023473	JL	0	0	0	0	1	0
Z010E0048:628NVAAXX:7:250023485	JL	0	0	0	0	1	0
Z010E0049:628NVAAXX:6:250023387	JL	0	0	0	0	1	0
Z010E0050:628NVAAXX:6:250023399	JL	0	0	0	0	1	0
Z010E0051:628NVAAXX:6:250023411	JL	0	0	0	0	1	0
Z010E0052:628NVAAXX:6:250023423	JL	0	0	0	0	1	0
Z010E0053:628NVAAXX:7:250023450	JL	0	0	0	0	1	0
Z010E0054:627C3AAXX:4:250028680	JL	0	0	0	0	1	0
Z010E0056:627C3AAXX:4:250028685	JL	0	0	0	0	1	0
Z010E0057:628NVAAXX:6:250023388	JL	0	0	0	0	1	0
Z010E0058:628NVAAXX:6:250023400	JL	0	0	0	0	1	0
Z010E0059:628NVAAXX:6:250023412	JL	0	0	0	0	1	0
Z010E0060:628NVAAXX:6:250023424	JL	0	0	0	0	1	0
Z010E0061:628NVAAXX:7:250023451	JL	0	0	0	0	1	0
Z010E0062:628NVAAXX:7:250023463	JL	0	0	0	0	1	0
Z010E0063:628NVAAXX:7:250023475	JL	0	0	0	0	1	0
Z010E0064:628NVAAXX:7:250023487	JL	0	0	0	0	1	0
Z010E0065:628NVAAXX:6:250023389	JL	0	0	0	0	1	0
Z010E0067:628NVAAXX:6:250023413	JL	0	0	0	0	1	0
Z010E0068:628NVAAXX:6:250023425	JL	0	0	0	0	1	0
Z010E0069:628NVAAXX:7:250023452	JL	0	0	0	0	1	0
Z010E0071:628NVAAXX:7:250023476	JL	0	0	0	0	1	0
Z010E0072:628NVAAXX:7:250023488	JL	0	0	0	0	1	0
Z010E0073:628NVAAXX:6:250023390	JL	0	0	0	0	1	0
Z010E0074:628NVAAXX:6:250023402	JL	0	0	0	0	1	0
Z010E0075:628NVAAXX:6:250023414	JL	0	0	0	0	1	0
Z010E0076:628NVAAXX:6:250023426	JL	0	0	0	0	1	0
Z010E0077:628NVAAXX:7:250023453	JL	0	0	0	0	1	0
Z010E0078:628NVAAXX:7:250023465	JL	0	0	0	0	1	0
Z010E0080:628NVAAXX:7:250023489	JL	0	0	0	0	1	0
Z010E0081:628NVAAXX:6:250023391	JL	0	0	0	0	1	0
Z010E0082:628NVAAXX:6:250023403	JL	0	0	0	0	1	0
Z010E0083:628NVAAXX:6:250023415	JL	0	0	0	0	1	0
Z010E0085:628NVAAXX:7:250023454	JL	0	0	0	0	1	0
Z010E0086:628NVAAXX:7:250023466	JL	0	0	0	0	1	0
Z010E0088:628NVAAXX:7:250023490	JL	0	0	0	0	1	0
Z010E0089:628NVAAXX:6:250023404	JL	0	0	0	0	1	0
Z010E0090:628NVAAXX:6:250023416	JL	0	0	0	0	1	0
Z010E0091:633Y5AAXX:6:250028771	JL	0	0	0	0	1	0
Z010E0092:628NVAAXX:7:250023455	JL	0	0	0	0	1	0
Z010E0093:628NVAAXX:7:250023467	JL	0	0	0	0	1	0
Z010E0094:628NVAAXX:7:250023479	JL	0	0	0	0	1	0
Z010E0098:627C3AAXX:4:250028697	JL	0	0	0	0	1	0
Z010E0099:628DJAAXX:2:250023570	JL	0	0	0	0	1	0
Z010E0103:628DJAAXX:1:250023508	JL	0	0	0	0	1	0
Z010E0104:627C3AAXX:4:250028673	JL	0	0	0	0	1	0
Z010E0106:628DJAAXX:1:250023544	JL	0	0	0	0	1	0
Z010E0107:628DJAAXX:2:250023571	JL	0	0	0	0	1	0
Z010E0108:628DJAAXX:2:250023583	JL	0	0	0	0	1	0
Z010E0111:628DJAAXX:1:250023509	JL	0	0	0	0	1	0
Z010E0112:628DJAAXX:1:250023521	JL	0	0	0	0	1	0
Z010E0113:628DJAAXX:1:250023533	JL	0	0	0	0	1	0
Z010E0114:628DJAAXX:1:250023545	JL	0	0	0	0	1	0
Z010E0116:628DJAAXX:2:250023584	JL	0	0	0	0	1	0
Z010E0117:628DJAAXX:2:250023596	JL	0	0	0	0	1	0
Z010E0118:628DJAAXX:2:250023608	JL	0	0	0	0	1	0
Z010E0119:627C3AAXX:4:250028654	JL	0	0	0	0	1	0
Z010E0121:627C3AAXX:4:250028686	JL	0	0	0	0	1	0
Z010E0122:628DJAAXX:1:250023546	JL	0	0	0	0	1	0
Z010E0125:628DJAAXX:2:250023597	JL	0	0	0	0	1	0
Z010E0126:628DJAAXX:2:250023609	JL	0	0	0	0	1	0
Z010E0127:627C3AAXX:4:250028710	JL	0	0	0	0	1	0
Z010E0128:628DJAAXX:1:250023523	JL	0	0	0	0	1	0
Z010E0129:628DJAAXX:1:250023535	JL	0	0	0	0	1	0
Z010E0130:627C3AAXX:4:250028722	JL	0	0	0	0	1	0
Z010E0131:628DJAAXX:2:250023574	JL	0	0	0	0	1	0
Z010E0132:628DJAAXX:2:250023586	JL	0	0	0	0	1	0
Z010E0133:628DJAAXX:2:250023598	JL	0	0	0	0	1	0
Z010E0134:628DJAAXX:2:250023610	JL	0	0	0	0	1	0
Z010E0135:628DJAAXX:1:250023512	JL	0	0	0	0	1	0
Z010E0138:628DJAAXX:1:250023548	JL	0	0	0	0	1	0
Z010E0139:628DJAAXX:2:250023575	JL	0	0	0	0	1	0
Z010E0140:628DJAAXX:2:250023587	JL	0	0	0	0	1	0
Z010E0143:628DJAAXX:1:250023513	JL	0	0	0	0	1	0
Z010E0144:628DJAAXX:1:250023525	JL	0	0	0	0	1	0
Z010E0145:628DJAAXX:1:250023537	JL	0	0	0	0	1	0
Z010E0146:628DJAAXX:1:250023549	JL	0	0	0	0	1	0
Z010E0147:628DJAAXX:2:250023576	JL	0	0	0	0	1	0
Z010E0148:627C3AAXX:4:250028637	JL	0	0	0	0	1	0
Z010E0149:628DJAAXX:2:250023600	JL	0	0	0	0	1	0
Z010E0151:628DJAAXX:1:250023514	JL	0	0	0	0	1	0
Z010E0152:628DJAAXX:1:250023526	JL	0	0	0	0	1	0
Z010E0155:628DJAAXX:2:250023577	JL	0	0	0	0	1	0
Z010E0156:628DJAAXX:2:250023589	JL	0	0	0	0	1	0
Z010E0158:628DJAAXX:2:250023613	JL	0	0	0	0	1	0
Z010E0160:628DJAAXX:1:250023527	JL	0	0	0	0	1	0
Z010E0161:628DJAAXX:1:250023539	JL	0	0	0	0	1	0
Z010E0164:628DJAAXX:2:250023590	JL	0	0	0	0	1	0
Z010E0166:628DJAAXX:2:250023614	JL	0	0	0	0	1	0
Z010E0169:628DJAAXX:1:250023528	JL	0	0	0	0	1	0
Z010E0170:628DJAAXX:1:250023540	JL	0	0	0	0	1	0
Z010E0172:628DJAAXX:2:250023579	JL	0	0	0	0	1	0
Z010E0173:628DJAAXX:2:250023591	JL	0	0	0	0	1	0
Z010E0174:628DJAAXX:2:250023603	JL	0	0	0	0	1	0
Z010E0178:628DJAAXX:1:250023529	JL	0	0	0	0	1	0
Z010E0179:628DJAAXX:1:250023541	JL	0	0	0	0	1	0
Z010E0181:628DJAAXX:2:250023580	JL	0	0	0	0	1	0
Z010E0182:62P7LAAXX:6:250028276	JL	0	0	0	0	1	0
Z010E0185:628DJAAXX:2:250023616	JL	0	0	0	0	1	0
Z010E0186:628DJAAXX:1:250023530	JL	0	0	0	0	1	0
Z010E0188:628DJAAXX:1:250023554	JL	0	0	0	0	1	0
Z010E0191:628DJAAXX:2:250023605	JL	0	0	0	0	1	0
Z010E0192:628DJAAXX:2:250023617	JL	0	0	0	0	1	0
Z010E0193:62P7LAAXX:5:250028134	JL	0	0	0	0	1	0
Z010E0195:62P7LAAXX:5:250028154	JL	0	0	0	0	1	0
Z010E0198:62P7LAAXX:5:250028198	JL	0	0	0	0	1	0
Z010E0200:62P7LAAXX:5:250028210	JL	0	0	0	0	1	0
Z022E0001:709G4AAXX:5:250026610	JL	0	0	0	1	0	0
Z022E0002:709G4AAXX:5:250026647	JL	0	0	0	1	0	0
Z022E0003:709G4AAXX:5:250026630	JL	0	0	0	1	0	0
Z022E0004:709G4AAXX:5:250026650	JL	0	0	0	1	0	0
Z022E0005:709G4AAXX:5:250026662	JL	0	0	0	1	0	0
Z022E0006:709G4AAXX:5:250026674	JL	0	0	0	1	0	0
Z022E0007:709G4AAXX:5:250026686	JL	0	0	0	1	0	0
Z022E0008:709G4AAXX:5:250026603	JL	0	0	0	1	0	0
Z022E0009:709G4AAXX:5:250026611	JL	0	0	0	1	0	0
Z022E0010:709G4AAXX:5:250026619	JL	0	0	0	1	0	0
Z022E0011:709G4AAXX:5:250026631	JL	0	0	0	1	0	0
Z022E0012:709G4AAXX:5:250026651	JL	0	0	0	1	0	0
Z022E0013:709G4AAXX:5:250026663	JL	0	0	0	1	0	0
Z022E0014:709G4AAXX:5:250026675	JL	0	0	0	1	0	0
Z022E0015:709G4AAXX:5:250026687	JL	0	0	0	1	0	0
Z022E0016:709G4AAXX:5:250026604	JL	0	0	0	1	0	0
Z022E0017:709G4AAXX:5:250026612	JL	0	0	0	1	0	0
Z022E0018:627C3AAXX:3:250028591	JL	0	0	0	1	0	0
Z022E0019:709G4AAXX:5:250026632	JL	0	0	0	1	0	0
Z022E0020:709G4AAXX:5:250026652	JL	0	0	0	1	0	0
Z022E0021:709G4AAXX:5:250026664	JL	0	0	0	1	0	0
Z022E0023:709G4AAXX:5:250026676	JL	0	0	0	1	0	0
Z022E0025:709G4AAXX:5:250026640	JL	0	0	0	1	0	0
Z022E0027:709G4AAXX:5:250026613	JL	0	0	0	1	0	0
Z022E0028:627C3AAXX:3:250028508	JL	0	0	0	1	0	0
Z022E0029:709G4AAXX:5:250026648	JL	0	0	0	1	0	0
Z022E0030:709G4AAXX:5:250026653	JL	0	0	0	1	0	0
Z022E0031:709G4AAXX:5:250026665	JL	0	0	0	1	0	0
Z022E0032:709G4AAXX:5:250026677	JL	0	0	0	1	0	0
Z022E0033:709G4AAXX:5:250026689	JL	0	0	0	1	0	0
Z022E0034:709G4AAXX:5:250026641	JL	0	0	0	1	0	0
Z022E0035:709G4AAXX:5:250026644	JL	0	0	0	1	0	0
Z022E0036:627C3AAXX:3:250028516	JL	0	0	0	1	0	0
Z022E0037:709G4AAXX:5:250026633	JL	0	0	0	1	0	0
Z022E0038:709G4AAXX:5:250026654	JL	0	0	0	1	0	0
Z022E0039:709G4AAXX:5:250026666	JL	0	0	0	1	0	0
Z022E0040:709G4AAXX:5:250026678	JL	0	0	0	1	0	0
Z022E0041:709G4AAXX:5:250026690	JL	0	0	0	1	0	0
Z022E0042:709G4AAXX:5:250026605	JL	0	0	0	1	0	0
Z022E0043:709G4AAXX:5:250026645	JL	0	0	0	1	0	0
Z022E0046:709G4AAXX:5:250026649	JL	0	0	0	1	0	0
Z022E0047:709G4AAXX:5:250026655	JL	0	0	0	1	0	0
Z022E0048:709G4AAXX:5:250026667	JL	0	0	0	1	0	0
Z022E0049:709G4AAXX:5:250026679	JL	0	0	0	1	0	0
Z022E0050:627C3AAXX:3:250028524	JL	0	0	0	1	0	0
Z022E0051:709G4AAXX:5:250026642	JL	0	0	0	1	0	0
Z022E0052:709G4AAXX:5:250026646	JL	0	0	0	1	0	0
Z022E0053:627C3AAXX:3:250028536	JL	0	0	0	1	0	0
Z022E0054:709G4AAXX:5:250026634	JL	0	0	0	1	0	0
Z022E0056:709G4AAXX:5:250026656	JL	0	0	0	1	0	0
Z022E0057:709G4AAXX:5:250026668	JL	0	0	0	1	0	0
Z022E0058:627C3AAXX:3:250028556	JL	0	0	0	1	0	0
Z022E0059:709G4AAXX:5:250026692	JL	0	0	0	1	0	0
Z022E0061:709G4AAXX:5:250026614	JL	0	0	0	1	0	0
Z022E0062:709G4AAXX:5:250026625	JL	0	0	0	1	0	0
Z022E0063:709G4AAXX:5:250026635	JL	0	0	0	1	0	0
Z022E0064:709G4AAXX:5:250026657	JL	0	0	0	1	0	0
Z022E0065:709G4AAXX:5:250026669	JL	0	0	0	1	0	0
Z022E0066:709G4AAXX:5:250026681	JL	0	0	0	1	0	0
Z022E0067:709G4AAXX:5:250026693	JL	0	0	0	1	0	0
Z022E0068:709G4AAXX:5:250026643	JL	0	0	0	1	0	0
Z022E0069:709G4AAXX:5:250026615	JL	0	0	0	1	0	0
Z022E0070:709G4AAXX:5:250026626	JL	0	0	0	1	0	0
Z022E0071:709G4AAXX:5:250026636	JL	0	0	0	1	0	0
Z022E0072:709G4AAXX:5:250026658	JL	0	0	0	1	0	0
Z022E0073:709G4AAXX:5:250026670	JL	0	0	0	1	0	0
Z022E0074:709G4AAXX:5:250026682	JL	0	0	0	1	0	0
Z022E0075:709G4AAXX:5:250026694	JL	0	0	0	1	0	0
Z022E0076:709G4AAXX:5:250026607	JL	0	0	0	1	0	0
Z022E0077:709G4AAXX:5:250026616	JL	0	0	0	1	0	0
Z022E0078:709G4AAXX:5:250026627	JL	0	0	0	1	0	0
Z022E0079:709G4AAXX:5:250026637	JL	0	0	0	1	0	0
Z022E0080:709G4AAXX:5:250026659	JL	0	0	0	1	0	0
Z022E0081:709G4AAXX:5:250026671	JL	0	0	0	1	0	0
Z022E0082:709G4AAXX:5:250026683	JL	0	0	0	1	0	0
Z022E0083:627C3AAXX:3:250028568	JL	0	0	0	1	0	0
Z022E0084:709G4AAXX:5:250026608	JL	0	0	0	1	0	0
Z022E0085:709G4AAXX:5:250026617	JL	0	0	0	1	0	0
Z022E0086:709G4AAXX:5:250026628	JL	0	0	0	1	0	0
Z022E0087:709G4AAXX:5:250026638	JL	0	0	0	1	0	0
Z022E0088:709G4AAXX:5:250026660	JL	0	0	0	1	0	0
Z022E0089:709G4AAXX:5:250026672	JL	0	0	0	1	0	0
Z022E0090:627C3AAXX:4:250028658	JL	0	0	0	1	0	0
Z022E0091:709G4AAXX:5:250026696	JL	0	0	0	1	0	0
Z022E0092:709G4AAXX:5:250026618	JL	0	0	0	1	0	0
Z022E0093:709G4AAXX:5:250026629	JL	0	0	0	1	0	0
Z022E0094:709G4AAXX:5:250026639	JL	0	0	0	1	0	0
Z022E0095:709G4AAXX:5:250026661	JL	0	0	0	1	0	0
Z022E0096:709G4AAXX:5:250026673	JL	0	0	0	1	0	0
Z022E0097:709G4AAXX:5:250026685	JL	0	0	0	1	0	0
Z022E0098:709G4AAXX:5:250026697	JL	0	0	0	1	0	0
Z022E0099:709G4AAXX:6:250026737	JL	0	0	0	1	0	0
Z022E0100:709G4AAXX:6:250026774	JL	0	0	0	1	0	0
Z022E0101:627C3AAXX:3:250028580	JL	0	0	0	1	0	0
Z022E0102:627C3AAXX:3:250028592	JL	0	0	0	1	0	0
Z022E0103:709G4AAXX:6:250026789	JL	0	0	0	1	0	0
Z022E0104:709G4AAXX:6:250026801	JL	0	0	0	1	0	0
Z022E0105:709G4AAXX:6:250026813	JL	0	0	0	1	0	0
Z022E0106:709G4AAXX:6:250026730	JL	0	0	0	1	0	0
Z022E0107:709G4AAXX:6:250026738	JL	0	0	0	1	0	0
Z022E0108:709G4AAXX:6:250026746	JL	0	0	0	1	0	0
Z022E0109:709G4AAXX:6:250026758	JL	0	0	0	1	0	0
Z022E0110:709G4AAXX:6:250026778	JL	0	0	0	1	0	0
Z022E0111:709G4AAXX:6:250026790	JL	0	0	0	1	0	0
Z022E0112:709G4AAXX:6:250026802	JL	0	0	0	1	0	0
Z022E0113:709G4AAXX:6:250026814	JL	0	0	0	1	0	0
Z022E0114:709G4AAXX:6:250026731	JL	0	0	0	1	0	0
Z022E0115:709G4AAXX:6:250026739	JL	0	0	0	1	0	0
Z022E0116:709G4AAXX:6:250026747	JL	0	0	0	1	0	0
Z022E0117:709G4AAXX:6:250026759	JL	0	0	0	1	0	0
Z022E0118:709G4AAXX:6:250026779	JL	0	0	0	1	0	0
Z022E0119:709G4AAXX:6:250026791	JL	0	0	0	1	0	0
Z022E0120:709G4AAXX:6:250026803	JL	0	0	0	1	0	0
Z022E0121:709G4AAXX:6:250026815	JL	0	0	0	1	0	0
Z022E0123:709G4AAXX:6:250026740	JL	0	0	0	1	0	0
Z022E0124:709G4AAXX:6:250026748	JL	0	0	0	1	0	0
Z022E0125:709G4AAXX:6:250026775	JL	0	0	0	1	0	0
Z022E0126:709G4AAXX:6:250026780	JL	0	0	0	1	0	0
Z022E0127:709G4AAXX:6:250026792	JL	0	0	0	1	0	0
Z022E0128:709G4AAXX:6:250026804	JL	0	0	0	1	0	0
Z022E0129:709G4AAXX:6:250026816	JL	0	0	0	1	0	0
Z022E0130:709G4AAXX:6:250026768	JL	0	0	0	1	0	0
Z022E0131:709G4AAXX:6:250026771	JL	0	0	0	1	0	0
Z022E0132:709G4AAXX:6:250026749	JL	0	0	0	1	0	0
Z022E0133:709G4AAXX:6:250026760	JL	0	0	0	1	0	0
Z022E0134:709G4AAXX:6:250026781	JL	0	0	0	1	0	0
Z022E0135:709G4AAXX:6:250026793	JL	0	0	0	1	0	0
Z022E0136:709G4AAXX:6:250026805	JL	0	0	0	1	0	0
Z022E0137:709G4AAXX:6:250026817	JL	0	0	0	1	0	0
Z022E0138:709G4AAXX:6:250026732	JL	0	0	0	1	0	0
Z022E0139:709G4AAXX:6:250026772	JL	0	0	0	1	0	0
Z022E0140:709G4AAXX:6:250026750	JL	0	0	0	1	0	0
Z022E0141:627C3AAXX:3:250028509	JL	0	0	0	1	0	0
Z022E0142:709G4AAXX:6:250026782	JL	0	0	0	1	0	0
Z022E0145:709G4AAXX:6:250026806	JL	0	0	0	1	0	0
Z022E0146:709G4AAXX:6:250026818	JL	0	0	0	1	0	0
Z022E0147:627C3AAXX:3:250028517	JL	0	0	0	1	0	0
Z022E0148:709G4AAXX:6:250026773	JL	0	0	0	1	0	0
Z022E0149:709G4AAXX:6:250026751	JL	0	0	0	1	0	0
Z022E0150:709G4AAXX:6:250026761	JL	0	0	0	1	0	0
Z022E0151:709G4AAXX:6:250026783	JL	0	0	0	1	0	0
Z022E0153:709G4AAXX:6:250026807	JL	0	0	0	1	0	0
Z022E0154:627C3AAXX:3:250028525	JL	0	0	0	1	0	0
Z022E0155:627C3AAXX:3:250028537	JL	0	0	0	1	0	0
Z022E0156:709G4AAXX:6:250026741	JL	0	0	0	1	0	0
Z022E0157:709G4AAXX:6:250026752	JL	0	0	0	1	0	0
Z022E0158:709G4AAXX:6:250026762	JL	0	0	0	1	0	0
Z022E0159:709G4AAXX:6:250026784	JL	0	0	0	1	0	0
Z022E0160:627C3AAXX:3:250028557	JL	0	0	0	1	0	0
Z022E0161:709G4AAXX:6:250026808	JL	0	0	0	1	0	0
Z022E0162:709G4AAXX:6:250026820	JL	0	0	0	1	0	0
Z022E0163:709G4AAXX:6:250026770	JL	0	0	0	1	0	0
Z022E0164:709G4AAXX:6:250026742	JL	0	0	0	1	0	0
Z022E0165:709G4AAXX:6:250026753	JL	0	0	0	1	0	0
Z022E0166:709G4AAXX:6:250026763	JL	0	0	0	1	0	0
Z022E0167:709G4AAXX:6:250026785	JL	0	0	0	1	0	0
Z022E0168:627C3AAXX:3:250028569	JL	0	0	0	1	0	0
Z022E0169:709G4AAXX:6:250026809	JL	0	0	0	1	0	0
Z022E0170:709G4AAXX:6:250026821	JL	0	0	0	1	0	0
Z022E0171:709G4AAXX:6:250026734	JL	0	0	0	1	0	0
Z022E0172:709G4AAXX:6:250026743	JL	0	0	0	1	0	0
Z022E0173:709G4AAXX:6:250026754	JL	0	0	0	1	0	0
Z022E0174:709G4AAXX:6:250026764	JL	0	0	0	1	0	0
Z022E0175:709G4AAXX:6:250026786	JL	0	0	0	1	0	0
Z022E0176:709G4AAXX:6:250026798	JL	0	0	0	1	0	0
Z022E0177:627C3AAXX:3:250028581	JL	0	0	0	1	0	0
Z022E0178:709G4AAXX:6:250026822	JL	0	0	0	1	0	0
Z022E0179:709G4AAXX:6:250026735	JL	0	0	0	1	0	0
Z022E0180:709G4AAXX:6:250026744	JL	0	0	0	1	0	0
Z022E0181:709G4AAXX:6:250026755	JL	0	0	0	1	0	0
Z022E0182:627C3AAXX:3:250028593	JL	0	0	0	1	0	0
Z022E0183:709G4AAXX:6:250026787	JL	0	0	0	1	0	0
Z022E0184:709G4AAXX:6:250026799	JL	0	0	0	1	0	0
Z022E0185:709G4AAXX:6:250026811	JL	0	0	0	1	0	0
Z022E0186:709G4AAXX:6:250026823	JL	0	0	0	1	0	0
Z022E0187:709G4AAXX:6:250026745	JL	0	0	0	1	0	0
Z022E0188:709G4AAXX:6:250026756	JL	0	0	0	1	0	0
Z022E0189:709G4AAXX:6:250026766	JL	0	0	0	1	0	0
Z022E0190:709G4AAXX:6:250026788	JL	0	0	0	1	0	0
Z022E0191:709G4AAXX:6:250026800	JL	0	0	0	1	0	0
Z022E0192:709G4AAXX:6:250026812	JL	0	0	0	1	0	0
Z022E0193:709G4AAXX:6:250026824	JL	0	0	0	1	0	0
Z022E0194:627C3AAXX:3:250028545	JL	0	0	0	1	0	0
Z022E0195:627C3AAXX:3:250028518	JL	0	0	0	1	0	0
Z022E0196:627C3AAXX:3:250028526	JL	0	0	0	1	0	0
Z022E0197:627C3AAXX:3:250028553	JL	0	0	0	1	0	0
Z022E0198:627C3AAXX:3:250028558	JL	0	0	0	1	0	0
Z022E0199:627C3AAXX:3:250028570	JL	0	0	0	1	0	0
Z022E0200:627C3AAXX:3:250028582	JL	0	0	0	1	0	0
Z024E0001:MRG:2:250027118	JL	0	0	0	0	0	1
Z024E0004:MRG:2:250027138	JL	0	0	0	0	0	1
Z024E0006:MRG:2:250027170	JL	0	0	0	0	0	1
Z024E0009:D260TACXX:5:250183137	JL	0	0	0	0	0	1
Z024E0010:627C3AAXX:2:250028393	JL	0	0	0	0	0	1
Z024E0011:MRG:2:250027119	JL	0	0	0	0	0	1
Z024E0012:MRG:2:250027127	JL	0	0	0	0	0	1
Z024E0016:D260TACXX:5:250183138	JL	0	0	0	0	0	1
Z024E0017:627C3AAXX:2:250028404	JL	0	0	0	0	0	1
Z024E0020:MRG:2:250027120	JL	0	0	0	0	0	1
Z024E0021:MRG:2:250027128	JL	0	0	0	0	0	1
Z024E0022:MRG:2:250027140	JL	0	0	0	0	0	1
Z024E0024:MRG:2:250027172	JL	0	0	0	0	0	1
Z024E0025:MRG:2:250027184	JL	0	0	0	0	0	1
Z024E0026:MRG:2:250027196	JL	0	0	0	0	0	1
Z024E0027:MRG:2:250027148	JL	0	0	0	0	0	1
Z024E0029:MRG:2:250027129	JL	0	0	0	0	0	1
Z024E0030:627C3AAXX:2:250028414	JL	0	0	0	0	0	1
Z024E0032:MRG:2:250027173	JL	0	0	0	0	0	1
Z024E0033:MRG:2:250027185	JL	0	0	0	0	0	1
Z024E0037:MRG:2:250027130	JL	0	0	0	0	0	1
Z024E0038:627C3AAXX:4:250028714	JL	0	0	0	0	0	1
Z024E0040:MRG:2:250027174	JL	0	0	0	0	0	1
Z024E0041:MRG:2:250027186	JL	0	0	0	0	0	1
Z024E0042:MRG:2:250027198	JL	0	0	0	0	0	1
Z024E0044:MRG:2:250027153	JL	0	0	0	0	0	1
Z024E0045:MRG:2:250027131	JL	0	0	0	0	0	1
Z024E0047:MRG:2:250027163	JL	0	0	0	0	0	1
Z024E0048:MRG:2:250027175	JL	0	0	0	0	0	1
Z024E0049:MRG:2:250027187	JL	0	0	0	0	0	1
Z024E0050:MRG:2:250027199	JL	0	0	0	0	0	1
Z024E0051:MRG:2:250027150	JL	0	0	0	0	0	1
Z024E0054:MRG:2:250027142	JL	0	0	0	0	0	1
Z024E0056:MRG:2:250027176	JL	0	0	0	0	0	1
Z024E0057:627C3AAXX:4:250028726	JL	0	0	0	0	0	1
Z024E0058:MRG:2:250027200	JL	0	0	0	0	0	1
Z024E0059:MRG:2:250027114	JL	0	0	0	0	0	1
Z024E0060:MRG:2:250027122	JL	0	0	0	0	0	1
Z024E0061:MRG:2:250027133	JL	0	0	0	0	0	1
Z024E0063:MRG:2:250027165	JL	0	0	0	0	0	1
Z024E0069:MRG:2:250027189	JL	0	0	0	0	0	1
Z024E0070:627C3AAXX:4:250028639	JL	0	0	0	0	0	1
Z024E0071:MRG:2:250027151	JL	0	0	0	0	0	1
Z024E0072:MRG:2:250027123	JL	0	0	0	0	0	1
Z024E0074:MRG:2:250027144	JL	0	0	0	0	0	1
Z024E0075:627C3AAXX:4:250028648	JL	0	0	0	0	0	1
Z024E0076:MRG:2:250027178	JL	0	0	0	0	0	1
Z024E0077:627C3AAXX:2:250028436	JL	0	0	0	0	0	1
Z024E0078:MRG:2:250027202	JL	0	0	0	0	0	1
Z024E0079:MRG:2:250027115	JL	0	0	0	0	0	1
Z024E0080:627C3AAXX:2:250028448	JL	0	0	0	0	0	1
Z024E0081:627C3AAXX:4:250028659	JL	0	0	0	0	0	1
Z024E0082:MRG:2:250027145	JL	0	0	0	0	0	1
Z024E0083:MRG:2:250027167	JL	0	0	0	0	0	1
Z024E0084:MRG:2:250027179	JL	0	0	0	0	0	1
Z024E0085:MRG:2:250027191	JL	0	0	0	0	0	1
Z024E0086:MRG:2:250027203	JL	0	0	0	0	0	1
Z024E0087:MRG:2:250027116	JL	0	0	0	0	0	1
Z024E0088:MRG:2:250027125	JL	0	0	0	0	0	1
Z024E0090:MRG:2:250027146	JL	0	0	0	0	0	1
Z024E0091:MRG:2:250027168	JL	0	0	0	0	0	1
Z024E0093:MRG:2:250027192	JL	0	0	0	0	0	1
Z024E0094:MRG:2:250027204	JL	0	0	0	0	0	1
Z024E0095:MRG:2:250027126	JL	0	0	0	0	0	1
Z024E0096:MRG:2:250027137	JL	0	0	0	0	0	1
Z024E0097:MRG:2:250027147	JL	0	0	0	0	0	1
Z024E0098:MRG:2:250027169	JL	0	0	0	0	0	1
Z024E0099:MRG:2:250027181	JL	0	0	0	0	0	1
Z024E0100:627C3AAXX:4:250028691	JL	0	0	0	0	0	1
Z024E0101:MRG:2:250027205	JL	0	0	0	0	0	1
Z024E0103:627C3AAXX:4:250028703	JL	0	0	0	0	0	1
Z024E0104:70980AAXX:3:250027265	JL	0	0	0	0	0	1
Z024E0105:70980AAXX:3:250027285	JL	0	0	0	0	0	1
Z024E0106:MRG:2:250042613	JL	0	0	0	0	0	1
Z024E0107:MRG:2:250042614	JL	0	0	0	0	0	1
Z024E0108:70980AAXX:3:250027321	JL	0	0	0	0	0	1
Z024E0110:70980AAXX:3:250027246	JL	0	0	0	0	0	1
Z024E0111:70980AAXX:3:250027254	JL	0	0	0	0	0	1
Z024E0112:70980AAXX:3:250027266	JL	0	0	0	0	0	1
Z024E0113:MRG:2:250042615	JL	0	0	0	0	0	1
Z024E0114:70980AAXX:3:250027298	JL	0	0	0	0	0	1
Z024E0115:70980AAXX:3:250027310	JL	0	0	0	0	0	1
Z024E0116:MRG:2:250042616	JL	0	0	0	0	0	1
Z024E0117:70980AAXX:3:250027239	JL	0	0	0	0	0	1
Z024E0118:70980AAXX:3:250027247	JL	0	0	0	0	0	1
Z024E0119:70980AAXX:3:250027255	JL	0	0	0	0	0	1
Z024E0120:70980AAXX:3:250027267	JL	0	0	0	0	0	1
Z024E0121:70980AAXX:3:250027287	JL	0	0	0	0	0	1
Z024E0122:70980AAXX:3:250027299	JL	0	0	0	0	0	1
Z024E0123:70980AAXX:3:250027311	JL	0	0	0	0	0	1
Z024E0124:70980AAXX:3:250027323	JL	0	0	0	0	0	1
Z024E0126:70980AAXX:3:250027248	JL	0	0	0	0	0	1
Z024E0127:70980AAXX:3:250027256	JL	0	0	0	0	0	1
Z024E0128:70980AAXX:3:250027283	JL	0	0	0	0	0	1
Z024E0129:70980AAXX:3:250027288	JL	0	0	0	0	0	1
Z024E0131:70980AAXX:3:250027312	JL	0	0	0	0	0	1
Z024E0133:70980AAXX:3:250027276	JL	0	0	0	0	0	1
Z024E0135:70980AAXX:3:250027257	JL	0	0	0	0	0	1
Z024E0136:70980AAXX:3:250027268	JL	0	0	0	0	0	1
Z024E0137:70980AAXX:3:250027289	JL	0	0	0	0	0	1
Z024E0138:70980AAXX:3:250027301	JL	0	0	0	0	0	1
Z024E0141:70980AAXX:3:250027240	JL	0	0	0	0	0	1
Z024E0144:70980AAXX:3:250027284	JL	0	0	0	0	0	1
Z024E0145:70980AAXX:3:250027290	JL	0	0	0	0	0	1
Z024E0146:70980AAXX:3:250027302	JL	0	0	0	0	0	1
Z024E0152:70980AAXX:3:250027269	JL	0	0	0	0	0	1
Z024E0157:627C3AAXX:2:250028472	JL	0	0	0	0	0	1
Z024E0158:70980AAXX:3:250027249	JL	0	0	0	0	0	1
Z024E0159:70980AAXX:3:250027260	JL	0	0	0	0	0	1
Z024E0161:70980AAXX:3:250027292	JL	0	0	0	0	0	1
Z024E0163:70980AAXX:3:250027316	JL	0	0	0	0	0	1
Z024E0164:70980AAXX:3:250027328	JL	0	0	0	0	0	1
Z024E0165:70980AAXX:3:250027278	JL	0	0	0	0	0	1
Z024E0172:70980AAXX:3:250027329	JL	0	0	0	0	0	1
Z024E0186:70980AAXX:3:250027295	JL	0	0	0	0	0	1
Z024E0187:70980AAXX:3:250027307	JL	0	0	0	0	0	1
Z024E0188:70980AAXX:3:250027319	JL	0	0	0	0	0	1
Z024E0192:70980AAXX:3:250027274	JL	0	0	0	0	0	1
Z024E0195:70980AAXX:3:250027320	JL	0	0	0	0	0	1
Z024E0198:627C3AAXX:2:250028394	JL	0	0	0	0	0	1
Z024E0199:627C3AAXX:2:250028405	JL	0	0	0	0	0	1
